# CD19<sup>+</sup>IgD<sup>+</sup>CD27<sup>-</sup> naïve B Cells as predictors of humoral response to COVID-19 mRNA vaccination in immunocompromised patients

Eduard Schulz<sup>1\*</sup>, Isabel Hodl<sup>2\*</sup>, Patrick Forstner<sup>3</sup>, Stefan Hatzl<sup>1</sup>, Nazanin Sareban<sup>4</sup>, Martina Moritz<sup>4</sup>, Johannes Fessler<sup>5</sup>, Barbara Dreo<sup>2</sup>, Barbara Uhl<sup>1</sup>, Claudia Url<sup>4</sup>, Andrea Grisold<sup>3</sup>, Michael Khalil<sup>6</sup>, Barbara Kleinhapl<sup>3</sup>, Christian Enzinger<sup>6</sup>, Martin H. Stradner<sup>2</sup>, Hildegard Greinix<sup>1</sup>, Peter Schlenke<sup>4</sup> and Ivo Steinmetz<sup>3</sup>

\*ES and IH contributed equally to the manuscript.

<sup>1</sup>Division of Hematology, Department of Internal Medicine, Medical University of Graz, Graz, Austria

<sup>2</sup>Division of Rheumatology and Immunology, Department of Internal Medicine, Medical University of Graz, Graz, Austria

<sup>3</sup>Institute of Hygiene, Microbiology and Environmental Medicine, Medical University of Graz, Graz, Austria

<sup>4</sup>Department of Blood Group Serology and Transfusion Medicine, Medical University of Graz, Graz, Austria

<sup>5</sup>Institute of Immunology and Pathophysiology, Medical University of Graz, Graz, Austria

<sup>6</sup>Department of Neurology, Medical University of Graz, Graz, Austria

Corresponding author:

Martin H. Stradner  
Division of Rheumatology and Immunology  
Department of Internal Medicine  
Medical University of Graz  
Auenbruggerplatz 15, 8036 Graz, Austria  
Tel: +43/316/385-81794  
Fax: +43/316/385-17813  
E-mail: martin.stradner@medunigraz.at

The authors declare no competing financial interests.

Key words: mRNA vaccine, COVID-19, B cells, cancer, immunodeficiency

## ABSTRACT

Immunocompromised patients are considered high-risk and prioritized for vaccination against COVID-19. We aimed to analyze B-cell subsets in these patients to identify potential predictors of humoral vaccination response. Patients (n=120) suffering from hematologic malignancies or other causes of immunodeficiency and healthy controls (n=79) received a full vaccination series with an mRNA vaccine. B-cell subsets were analyzed prior to vaccination. Two independent anti-SARS-CoV-2 immunoassays targeting the receptor-binding domain (RBD) or trimeric S protein (TSP) were performed three to four weeks after the second vaccination. Seroconversion occurred in 100% of healthy controls, in contrast to 67% (RBD) and 82% (TSP) of immunocompromised patients, while only 32% (RBD) and 22% (TSP) achieved antibody levels comparable to those of healthy controls. The number of circulating CD19<sup>+</sup>IgD<sup>+</sup>CD27<sup>-</sup> naïve B cells was strongly associated with antibody levels ( $p=0.761$ ,  $P<0.001$ ) and the only independent predictor for achieving antibody levels comparable to healthy controls (OR 1.07 per 10- $\mu$ l increase, 95%CI 1.02–1.12,  $P=0.009$ ). Receiver operating characteristic analysis identified a cut-off at  $\geq 61$  naïve B cells per  $\mu$ l to discriminate between patients with and without an optimal antibody response. Consequently, measuring naïve B cells in immunocompromised hematologic patients could be useful in predicting their humoral vaccination response.

# 1 INTRODUCTION

2 Coronavirus disease 2019 (COVID-19) results in increased morbidity and mortality in  
3 immunocompromised patients.(1-3) Immunodeficiency can be primary (PID) due to underlying genetic  
4 causes such as common variable immunodeficiency or secondary (SID) resulting from hematologic  
5 malignancies (HM), immunosuppressive therapies, or hematopoietic stem cell transplantation (HSCT).  
6 In a recent study of 100 patients with COVID-19 disease, patients with PID and SID demonstrated  
7 higher morbidity and mortality than the general population, while the outcomes of individuals suffering  
8 from SID were the worst.(1) In patients with HM and COVID-19, a mortality rate of 34% (95%  
9 confidence interval [CI]: 28–39) has been reported in adults in a recent meta-analysis including 3377  
10 predominantly hospitalized patients from 3 continents.(4) Interestingly, patients on systemic anticancer  
11 treatment had a similar risk of death compared to patients without therapy (RR 1.17, 95% CI: 0.83-1.64).  
12 Risk of death was highest in patients with acquired bone marrow failure syndromes (53%, 95% CI: 34-  
13 72), followed by acute leukemias (41%, 95% CI: 30-52), myeloproliferative neoplasms (34%, 95% CI:  
14 19-51), plasma cell dyscrasias (33%, 95% CI: 25-41), lymphomas (32%, 95% CI: 18-48), and chronic  
15 lymphocytic leukemias (CLL) (31%, 95% CI: 23-40), respectively.

16 Patients with HM can be immunocompromised due to the underlying malignancy itself, prior or ongoing  
17 treatments with a high degree of immunosuppressive effects such as corticosteroids, B-cell depleting  
18 therapies, HSCT and other cellular therapies. In individuals with these risk factors, lower rates of  
19 seroconversion have been reported after COVID-19 infection whereas other cancer patients developed  
20 antibody response similar to healthy individuals.(5, 6) Roeker and colleagues observed that 67% of  
21 patients with CLL developed IgG antibodies to SARS-CoV-2 nucleocapsid and the seroconversion rate  
22 among recipients of HSCT and chimeric antigen receptor (CAR) T-cell therapy was similar at 66%.(7,  
23 8)

24 Due to the high risk of severe COVID-19 in immunocompromised patients, they are considered a high  
25 priority for COVID-19 vaccination.(9-13) However, trials of the currently approved COVID-19  
26 vaccines have excluded individuals diagnosed with immunodeficiency or malignancy; therefore,  
27 information on the efficacy and safety of the vaccines in these patients is sparse.(14-17) It is well known

28 that vaccinations in patients early after HSCT and anti-CD20 therapies as well as with several forms of  
29 PID have low efficacy.(18-20) The humoral immune response to a recombinant zoster vaccine in  
30 patients with B-cell lymphoma and CLL was between 20% and 50% compared to 80% in patients with  
31 other HM.(21)

32 Lack of antibody responses after COVID-19 vaccination and significantly lower antibody levels in  
33 responders have been reported in HM patient cohorts in general(5, 22, 23) and in selected patients with  
34 multiple myeloma, CLL, and non-Hodgkin's lymphoma.(24-28) Low efficacy of COVID-19  
35 vaccinations was observed when administered soon after HSCT and anti-CD20 therapies.(9, 18, 19)  
36 Furthermore, immunocompromised patients due to inborn errors of immunity or autoimmune rheumatic  
37 disease (AIRD) demonstrated also reduced rates in seroconversion, especially when given B-cell-  
38 depleting therapy and glucocorticoids.(14-17)

39 Peripheral B cells are needed for humoral vaccination responses.(29) However, the number of  
40 circulating B cells or of a certain B-cell subset associated with a humoral vaccination response  
41 comparable to healthy individuals is unknown. A marker predictive of vaccination response would aid  
42 to schedule vaccinations in the immunocompromised patients to achieve an optimal vaccination  
43 response.

44 We hypothesize that specific B-cell subsets have to be present in immunocompromised individuals to  
45 enable a humoral vaccination response. Herein, we used data from an interim analysis of the prospective,  
46 open-label, phase IV CoVVac trial (NCT04858607) to test this hypothesis.

## 47 **MATERIALS AND METHODS**

### 48 **Study design and participants**

49 We report the data of an interim analysis of the CoVVac trial (NCT04858607), which is an ongoing  
50 open-label, phase IV, prospective, monocentric study at the Medical University of Graz, Austria. After  
51 approval by the ethics committee of the Medical University of Graz in April 2021 (EK 1128/2021),  
52 patients with inborn errors of immunity, hematological malignancies, those receiving B-cell-depleting  
53 therapy, and healthy controls were recruited before receiving their first dose of COVID-19 vaccine. The

54 detailed study protocol is provided in the Supplementary Information. In brief, blood was drawn before  
55 the first vaccination with BNT162b2 (BioNTech/Pfizer) or mRNA-1273 (Moderna) for peripheral blood  
56 mononuclear cell (PBMC) isolation and lymphocyte phenotyping. The second vaccination was  
57 administered 21 (BNT162b2) or 28 days (mRNA-1273) after the first. Blood sampling was performed  
58 21–28 days after the second vaccination to analyze the COVID-19-specific antibody response as the  
59 primary endpoint.

## 60 **Lymphocyte phenotyping**

61 Blood samples from the baseline visit were processed within 4 hours for analysis by flow cytometry.  
62 For lymphocyte phenotyping, ethylenediaminetetraacetic acid whole blood was stained for CD3, CD4,  
63 CD8, CD45, CD16, CD56, and CD19, as previously described.(30) For B-cell phenotyping, PBMCs  
64 were isolated from lithium heparin whole blood by Ficoll gradient density centrifugation. One million  
65 PBMCs were incubated with the following antibodies: CD19-VioGreen, anti-IgD-VioBlue, CD24-  
66 PerCP-Vio700, CD38-FITC, CD27-APC, CD86-PE-Vio770, CD21-APC-Vio770, and anti-IgM-PE  
67 (Miltenyi Biotec, Bergisch Gladbach, Germany). Samples were measured using a FACSLyric flow  
68 cytometer (BD Biosciences, Franklin Lakes, NJ, USA). Data were analyzed using the FACSSuite (BD  
69 Biosciences). The gating strategy is shown in Supplemental Figure 1.

## 70 **Antibody assays**

71 Blood was obtained before first and 21–28 days after the second vaccination. Serum was aliquoted,  
72 frozen, and stored at -80°C until analysis was performed in batches. Two commercially available CE-  
73 certified serological tests were performed according to the manufacturers' protocols to determine and  
74 quantify specific antibodies against SARS-CoV-2. Specific IgG was determined using the Roche  
75 Elecsys anti-SARS-CoV-2 S electrochemiluminescence immunoassay targeting the receptor-binding  
76 domain of the viral spike protein using a Cobas e 801 analytical unit (Roche Diagnostics GmbH,  
77 Mannheim, Germany).(27, 29) Its quantification range lies between 0.4 and 2500 U/ml, with a cut-off  
78 of 0.8 U/ml for positivity. Specific IgG was measured by Liaison SARS-CoV-2 TrimericS IgG test on  
79 Liaison XL (DiaSorin, Saluggia, Italy), which is a chemiluminescence immunoassay quantifying

80 antibodies that target the trimeric S protein.(28) Results are provided in binding antibody units (BAU)  
81 with a quantification range of 4.81–2080 BAU/ml. Values  $\geq 33.8$  BAU/ml were considered positive.

## 82 **Statistical analysis**

83 All statistical analyses were performed using Stata 16.1 (Stata Corp., Houston, TX, USA). Continuous  
84 data were reported as medians (25th–75th percentile) and categorical data as absolute frequencies (%).  
85 Correlations and associations between antibody response and other variables were examined using  
86 Spearman's rank-based correlation coefficients, rank-sum test, and  $\chi^2$ -squared tests.  $R^2$ -statistics were  
87 obtained from multiple linear regression models with antibody response as the dependent variable. The  
88 optimal cut-off to separate patients with and without vaccination response was assessed by employing  
89 a maximized Youden's index within a receiver operating characteristic (ROC) analysis. Logistic models  
90 were used for univariate and multivariate modeling of the vaccination response. The Kruskal–Wallis  
91 test was used for continuous variables when comparing three or more treatment groups. The Kruskal-  
92 Wallis H test was used as a post-hoc test to determine between-group differences.

## 93 **RESULTS**

### 94 **Study population**

95 Data of 199 study participants who completed their full vaccination schedule were included in the  
96 efficacy analysis. Of these, 79 were healthy participants and 120 were immunocompromised patients.  
97 All study participants were vaccinated with mRNA-1273, with only two healthy individuals (1%)  
98 receiving BNT162b2. A total of 140 adverse events occurred after vaccination, with the most common  
99 being pain at the injection site, headache, fever, and fatigue. Four severe adverse events (hospitalization  
100 and death due to HM and bone fractures) were considered unrelated to vaccination. Participant  
101 characteristics are listed in Table 1. Diagnoses, immunosuppressive treatments, and antibody responses  
102 for subgroups are detailed in Supplementary Table 1.

103

104

105

106 **Table 1.**

| Variable                             | Healthy (n=79)   | Immunocompromised (n=120) | P                |
|--------------------------------------|------------------|---------------------------|------------------|
| Age (years)                          | 51 [36-56]       | 58 [50-65]                | <b>&lt;0.001</b> |
| Female gender n (%)                  | 45 (57)          | 65 (54)                   | 0.698            |
| Body mass index (kg/m <sup>2</sup> ) | 23.7 [21.6-26.4] | 24.8 [22.7-27.8]          | <b>0.039</b>     |
| <b>Vaccine</b>                       |                  |                           | 0.080            |
| mRNA-1273 (Moderna)                  | 77 (97)          | 120 (100)                 |                  |
| BNT162b2 (BioNTech/Pfizer)           | 2 (3)            | 0 (0)                     |                  |
| <b>Immunodeficiency group</b>        |                  |                           | n/a              |
| Primary immunodeficiency n (%)       |                  | 25 (21)                   |                  |
| Autoimmune disease n (%)             |                  | 39 (32)                   |                  |
| Hematologic disease n (%)            |                  | 56 (47)                   |                  |
| <b>B-cell depleting therapy</b>      |                  |                           | n/a              |
| None n (%)                           |                  | 44 (37)                   |                  |
| Rituximab n (%)                      |                  | 35 (29)                   |                  |
| Ocrelizumab n (%)                    |                  | 6 (5)                     |                  |
| HSCT n (%)                           |                  | 35 (29)                   |                  |
| Days since B-cell depletion          |                  | 166 [69-545]              |                  |

107 **Table 1.** Baseline characteristics of the study population. Data are reported as medians [25th-  
 108 75th percentile] and absolute frequencies (%). P-values are from rank-sum tests,  $\chi^2$ -tests, and Fisher's  
 109 exact tests, as appropriate. Significant P-values are highlighted in bold type. Abbreviations: n, number;  
 110 HSCT, hematopoietic stem cell transplantation

### 111 **Immunogenicity of mRNA vaccines**

112 Antibody responses were assessed using two different assays. All healthy controls demonstrated  
 113 seroconversion with high antibody titers (Roche median: 2500 U/ml; DiaSorin median: 2080 BAU/ml).  
 114 In immunocompromised patients, the seroconversion rates and antibody levels were significantly lower  
 115 than those in healthy controls (Table 2 and Figure 1); 67% (n = 80) and 82% (n = 98) of patients  
 116 demonstrated a humoral response with antibody levels within the quantification range of Roche and  
 117 DiaSorin assays, respectively. Since the clinical significance of antibody levels close to the limit of  
 118 detection was unclear, we defined more stringent thresholds for our patients, namely a "stringent  
 119 response" as reaching at least the lowest antibody level of the healthy individuals from our cohort (Roche  
 120  $\geq 1000$  U/ml; DiaSorin  $\geq 2000$  BAU/ml). According to this definition, only 32% (Roche) and 22%

121 (DiaSorin) of patients had a stringent antibody response. This difference was not statistically significant  
 122 between the two tests ( $P = 0.108$ ). Patients who received anti-CD20 therapy, including the majority of  
 123 patients with AIRD, had the lowest rate of stringent response ( $\leq 10\%$ ). Interestingly, patients who  
 124 received HSCT demonstrated a relatively high rate of stringent response [37% (13/35)]. There was no  
 125 statistically significant difference between allogeneic and autologous HSCT (40% vs. 30%, respectively;  
 126  $P = 0.541$ ). The antibody levels of both assays showed an excellent correlation with each other in the  
 127 patient population ( $\rho = 0.915$ ,  $P < 0.001$ ,  $R^2 = 0.841$ ; Table 2; Figure 2A), as well as in the entire study  
 128 population (Supplementary Figure 2A). Since the Roche assay is more widely used in research and  
 129 shows a good correlation with live virus neutralization tests in vaccinated individuals (22, 27, 29, 31),  
 130 we focused on the Roche assay for subsequent analyses to ensure comparability with other studies.

131 **Table 2.**

|                             | <b>Healthy (n=79)<br/>N (%)</b> | <b>Immunocompromised (n=120)<br/>N (%)</b> | <b>P</b>         |
|-----------------------------|---------------------------------|--------------------------------------------|------------------|
| Roche any response          | 79 (100)                        | 80 (67)                                    | <b>&lt;0.001</b> |
| Roche stringent response    | 79 (100)                        | 38 (32)                                    | <b>&lt;0.001</b> |
| Roche U/ml                  | 2500 [2500-2500]                | 67 [0-1947]                                | <b>&lt;0.001</b> |
| DiaSorin any response       | 79 (100)                        | 98 (82)                                    | <b>&lt;0.001</b> |
| DiaSorin stringent response | 79 (100)                        | 26 (22)                                    | <b>&lt;0.001</b> |
| DiaSorin BAU/ml             | 2080 [2080-2080]                | 233 [12-1760]                              | <b>&lt;0.001</b> |

132 **Table 2.** Antibody Response to Vaccination. Data are reported as medians [25th-75th percentile]  
 133 and absolute frequencies (%). P-values are from rank-sum tests,  $\chi^2$ -tests, and Fisher's exact tests, as  
 134 appropriate. Significant P-values are highlighted in bold type. Any response, any seroconversion; BAU,  
 135 binding antibody unit; DiaSorin stringent response, DiaSorin SARS-CoV-2 TrimericS IgG  $\geq 2000$   
 136 BAU/ml; HSCT, hematopoietic stem cell transplantation; Roche stringent response, Roche anti-SARS-  
 137 CoV-2 S total antibody titer  $\geq 1000$  U/ml.

138



## 139 **Correlation of antibody levels with the amount of B-cell subsets**

140 The total number of B cells and all B-cell subsets prior vaccination were positively correlated with the  
141 antibody levels in all patients (Roche:  $\rho = 0.739$ ,  $R^2 = 0.001$ ,  $P < 0.001$ ; Table 3; Figure 2B). In this  
142 analysis, the absolute number of naïve B cells showed the highest correlation with antibody titers  
143 (Roche:  $\rho = 0.761$ ,  $R^2 = 0.153$ ; Figure 2C). Furthermore, this analysis also indicated that the time  
144 between last B-cell-depleting therapy and vaccination was also a significant factor correlating with  
145 antibody levels. Extending this correlation analysis to the entire study population (Supplementary Figure  
146 2), the influence of naïve B cells remained highly significant (Roche:  $\rho = 0.636$ ,  $P < 0.001$ ,  $R^2 = 0.123$ ).

147 To support the results of our correlation analyses, we established a model of stringent vaccination  
148 response prediction for the entire study population based on the results of the Roche assay using the area  
149 under the ROC curve (AUC; Supplementary Table 2). This model suggests that the total number of  
150 CD19<sup>+</sup> B cells (AUC: 0.87, 95% CI: 0.79–0.92), CD19<sup>+</sup>IgD<sup>+</sup>CD27<sup>-</sup> naïve B cells (AUC: 0.82, 95% CI:  
151 0.73–0.88), CD19<sup>+</sup>IgD<sup>+</sup>CD27<sup>+</sup> pre-switched memory B cells (AUC: 0.84, 95% CI: 0.76–0.89), and  
152 CD19<sup>+</sup>IgD<sup>-</sup>CD27<sup>+</sup> switched memory B cells (AUC: 0.85, 95% CI: 0.79–0.91) can predict response to  
153 vaccination in the entire study population.

154

| Variable                                                                              | Roche anti-SARS-CoV-2 |                  |                |
|---------------------------------------------------------------------------------------|-----------------------|------------------|----------------|
|                                                                                       | $\rho$                | P                | R <sup>2</sup> |
| DiaSorin SARS-CoV-2 TrimericS IgG                                                     | 0.915                 | <b>&lt;0.001</b> | 0.841          |
| Age                                                                                   | 0.091                 | 0.321            | 0.001          |
| Body mass index                                                                       | 0.169                 | 0.076            | 0.004          |
| Days since last B-cell depletion                                                      | 0.595                 | <b>&lt;0.001</b> | 0.041          |
| Interval in days from last B-cell depleting therapy to vaccination up to 365 days     | 0.481                 | <b>0.001</b>     | 0.096          |
| IgA                                                                                   | 0.042                 | 0.651            | 0.015          |
| IgG                                                                                   | 0.065                 | 0.481            | 0.031          |
| IgM                                                                                   | 0.386                 | <b>&lt;0.001</b> | 0.002          |
| Lymphocytes abs.                                                                      | 0.222                 | 0.018            | 0.002          |
| CD3 <sup>+</sup> cells abs.                                                           | 0.112                 | 0.236            | 0.034          |
| CD3 <sup>+</sup> CD8 <sup>+</sup> cells abs.                                          | 0.170                 | 0.071            | 0.005          |
| CD3 <sup>+</sup> CD4 <sup>+</sup> cells abs.                                          | 0.025                 | 0.789            | 0.062          |
| CD3 <sup>-</sup> CD16 <sup>+</sup> CD56 <sup>+</sup> NK cells abs.                    | -0.014                | 0.880            | 0.014          |
| CD19 <sup>+</sup> abs.                                                                | 0.739                 | <b>&lt;0.001</b> | 0.001          |
| CD45 <sup>+</sup> cells abs.                                                          | 0.227                 | 0.015            | 0.002          |
| CD19 <sup>+</sup> IgM <sup>+</sup> CD38 <sup>++</sup> transitional B cells abs.       | 0.491                 | <b>&lt;0.001</b> | 0.033          |
| CD19 <sup>+</sup> IgD <sup>+</sup> CD27 <sup>-</sup> naïve B cells abs.               | 0.761                 | <b>&lt;0.001</b> | 0.153          |
| CD19 <sup>+</sup> IgD <sup>+</sup> CD27 <sup>+</sup> pre-switched memory B cells abs. | 0.657                 | <b>&lt;0.001</b> | 0.004          |
| CD19 <sup>+</sup> IgD <sup>-</sup> CD27 <sup>+</sup> switched memory B cells abs.     | 0.710                 | <b>&lt;0.001</b> | 0.003          |
| CD19 <sup>+</sup> CD38 <sup>-</sup> CD21 <sup>-</sup> B cells abs.                    | 0.640                 | <b>&lt;0.001</b> | 0.001          |
| CD19 <sup>+</sup> IgM <sup>-</sup> CD38 <sup>++</sup> plasmablasts abs.               | 0.580                 | <b>&lt;0.001</b> | 0.001          |

156 **Table 3.** Correlations of SARS-CoV-2 antibody response with variables in the  
157 immunocompromised study population. Correlations were computed with Spearman's rank-based rho  
158 adjusted for multiple testing (n=21) with Šidák correction. The Šidák-adjusted  $\alpha$  level is approximately  
159 0.00244. Significant P-values are highlighted in bold type. Abs., absolute count.

160

161 **CD19<sup>+</sup>IgD<sup>+</sup>CD27<sup>-</sup> naïve B cells show the strongest association with**  
162 **stringent response**

163 To test the association of variables with vaccination response determined by the Roche assay, we  
164 performed univariate and multivariate linear regression analyses using the same variables from the  
165 correlation analyses.

166 In univariate analysis (Table 4), the variables found to be significantly associated with any antibody  
167 response in patients included interval in days from the last B-cell-depleting therapy, CD19<sup>+</sup>IgD<sup>+</sup>CD27<sup>-</sup>  
168 naïve B-cell count, CD19<sup>+</sup>IgD<sup>+</sup>CD27<sup>+</sup> pre-switched memory B-cell count, and absolute number of  
169 CD19<sup>+</sup>IgM<sup>-</sup>CD38<sup>++</sup> plasmablasts. The same correlation was also found for stringent antibody responses,  
170 except for the correlation with CD19<sup>+</sup>IgD<sup>+</sup>CD27<sup>+</sup> pre-switched memory B cells. The absolute number  
171 of these B-cell subsets was significantly lower in immunocompromised patients than in healthy controls,  
172 in patients after anti-CD20 antibody therapy compared to HSCT, and in patients without seroconversion  
173 compared to those with any antibody response (not shown) or stringent response (Supplementary Figure  
174 3). Immunoglobulin levels and cell counts of immunodeficient patients stratified by vaccination  
175 response are shown in Supplementary Table 3. In univariate analysis of the entire study population  
176 (Supplementary Table 4), the same B-cell subsets remained significantly associated with vaccine  
177 response.

178 In multivariable analysis for stringent response, only the number of CD19<sup>+</sup>IgD<sup>+</sup>CD27<sup>-</sup> naïve B cells was  
179 an independent predictor (OR: 1.07 per 10- $\mu$ l increase, 95% CI: 1.02–1.12, P = 0.009). The only  
180 independent predictor of any seroconversion was CD19<sup>+</sup>IgM<sup>-</sup>CD38<sup>++</sup> plasmablast count (OR: 4.42 per  
181 1- $\mu$ l increase, 95% CI: 1.30–15.01, P = 0.017).

182 The multivariable analyses for the entire study population are shown in Supplementary Tables 5 and 6.  
183 The absolute number of CD19<sup>+</sup>IgD<sup>+</sup>CD27<sup>-</sup> naïve B cells remained an independent predictor of stringent  
184 antibody response (OR: 1.14 per 10- $\mu$ l increase, 95% CI: 1.08–1.20, P<0.001).

185

| Variable                                                                                                | Any Response |           |              | Stringent Response |           |                  |
|---------------------------------------------------------------------------------------------------------|--------------|-----------|--------------|--------------------|-----------|------------------|
|                                                                                                         | OR           | 95% CI    | P            | OR                 | 95% CI    | P                |
| Age (per 10 years)                                                                                      | 1.23         | 0.92-1.66 | 0.167        | 1.02               | 0.76-1.38 | 0.880            |
| Body mass index (per 5 point)                                                                           | 1.20         | 0.77-1.87 | 0.420        | 1.11               | 0.71-0.73 | 0.633            |
| Interval in days from last B-cell depleting therapy to vaccination up to 365 days (per 30 days)*        | 1.41         | 1.13-1.76 | <b>0.002</b> | 1.31               | 1.02-1.67 | <b>0.035</b>     |
| IgA (per 1g/l)                                                                                          | 0.74         | 0.50-1.10 | 0.136        | 1.30               | 0.87-1.93 | 0.199            |
| IgG (per 5g/l)                                                                                          | 0.96         | 0.62-1.49 | 0.848        | 1.43               | 0.90-2.27 | 0.127            |
| IgM (per 1g/l)                                                                                          | 1.32         | 0.83-2.10 | 0.246        | 0.98               | 0.92-1.05 | 0.677            |
| Lymphocytes abs. (per 1 G/l)                                                                            | 0.94         | 0.81-1.10 | 0.461        | 1.03               | 0.89-1.18 | 0.686            |
| CD3 <sup>+</sup> cells abs. (per 10/ $\mu$ l)                                                           | 1.00         | 0.99-1.01 | 0.693        | 1.00               | 0.99-1.01 | 0.101            |
| CD3 <sup>+</sup> CD8 <sup>+</sup> cells abs. (per 10/ $\mu$ l)                                          | 1.01         | 0.99-1.02 | 0.143        | 1.00               | 0.99-1.01 | 0.846            |
| CD3 <sup>+</sup> CD4 <sup>+</sup> cells abs. (per 10/ $\mu$ l)                                          | 0.99         | 0.98-1.01 | 0.403        | 1.01               | 1.00-1.02 | 0.009            |
| CD3 <sup>-</sup> CD16 <sup>+</sup> CD56 <sup>+</sup> NK cells abs. (per 10/ $\mu$ l)                    | 0.98         | 0.96-1.01 | 0.139        | 1.01               | 0.99-1.03 | 0.180            |
| CD19 <sup>+</sup> abs. (per 10/ $\mu$ l)                                                                | 0.99         | 0.99-1.01 | 0.401        | 0.99               | 0.99-1.01 | 0.931            |
| CD45 <sup>+</sup> cells abs. (per 10/ $\mu$ l)                                                          | 0.99         | 0.99-1.01 | 0.045        | 1.00               | 0.99-1.01 | 0.653            |
| CD19 <sup>+</sup> IgM <sup>+</sup> CD38 <sup>++</sup> transitional B cells abs. (per 1/ $\mu$ l)        | 1.17         | 0.97-1.42 | 0.094        | 1.05               | 0.96-1.15 | 0.233            |
| CD19 <sup>+</sup> IgD <sup>+</sup> CD27 <sup>-</sup> naïve B cells abs. (per 10/ $\mu$ l)               | 1.17         | 1.07-1.28 | <b>0.001</b> | 1.09               | 1.04-1.14 | <b>&lt;0.001</b> |
| CD19 <sup>+</sup> IgD <sup>+</sup> CD27 <sup>+</sup> pre-switched memory B cells abs. (per 10/ $\mu$ l) | 1.78         | 1.09-2.92 | <b>0.021</b> | 1.03               | 0.95-1.11 | 0.480            |

|                                                                                                     |      |           |                  |      |           |              |
|-----------------------------------------------------------------------------------------------------|------|-----------|------------------|------|-----------|--------------|
| CD19 <sup>+</sup> IgD <sup>-</sup> CD27 <sup>+</sup> switched memory B cells abs. (per 10/ $\mu$ l) | 0.99 | 0.99-1.01 | 0.406            | 0.99 | 0.99-1.00 | 0.957        |
| CD19 <sup>+</sup> CD38 <sup>-</sup> CD21 <sup>-</sup> B cells abs. (per 10/ $\mu$ l)                | 0.99 | 0.98-1.01 | 0.512            | 1.00 | 0.99-1.01 | 0.746        |
| CD19 <sup>+</sup> IgM <sup>-</sup> CD38 <sup>++</sup> plasmablasts abs. (per 1/ $\mu$ l)            | 7.95 | 2.68-23.4 | <b>&lt;0.001</b> | 1.85 | 1.24-2.74 | <b>0.002</b> |

188 **Table 4.** Univariate linear regression analysis to test the association of variables with vaccination  
189 response determined by the Roche anti-SARS-CoV-2 S assay in the immunodeficient cohort. Significant  
190 P-values are highlighted in bold type. Any response, any seroconversion; OR, odds ratio; stringent  
191 response, total antibody titer  $\geq 1000$  U/ml. Abs., absolute count.

192

## 193 Exploratory analyses

194 As CD19<sup>+</sup>IgD<sup>+</sup>CD27<sup>-</sup> naïve B cells were the only B-cell subset independently associated with stringent  
195 antibody response, we were interested to determine whether our dataset allowed to estimate a  
196 CD19<sup>+</sup>IgD<sup>+</sup>CD27<sup>-</sup> naïve B cell count threshold for stringent antibody response. ROC analysis and non-  
197 linear risk modeling predicted that  $\geq 61$  CD19<sup>+</sup>IgD<sup>+</sup>CD27<sup>-</sup> naïve B cells per  $\mu$ l discriminated best  
198 between patients with and without a stringent vaccine response (Figures 3A, B).

199 A second exploratory ROC analysis was undertaken to determine the minimum interval between last  
200 B-cell-depleting therapy, i.e., anti-CD20 antibody therapy or HSCT up to 365 days (n = 53), and  
201 vaccination differentiating any seroconversion versus no vaccination response. The optimal cut-off in  
202 this population was 116 days or more (Figure 3C).

## 203 DISCUSSION

204 Since the presence of B cells is a prerequisite for humoral vaccination responses, we investigated B cells  
205 overall and multiple B-cell subsets in immunocompromised patients and healthy controls prior to  
206 COVID-19 mRNA vaccination.

207 Our findings confirm recent reports observing significantly lower and more heterogeneous anti-SARS-  
208 CoV-2 S protein IgG titers in immunocompromised patients compared to healthy controls.(14, 15, 22,  
209 24-29) In one of the largest studies, Maneikis and colleagues reported lower median anti-S1 IgG  
210 responses after two BNT162b2 vaccine doses in 653 patients with HM compared to 69 healthy  
211 healthcare workers.(23) A similar heterogeneity in vaccination response has been observed in patients  
212 with PID,(14) AIRD,(16) and individuals given anti-CD20 therapy.(22, 23, 27, 32) In view of the  
213 heterogeneity of anti-SARS-CoV-2 antibody levels and the current lack of knowledge regarding the  
214 clinical consequences of low versus high titers in immunocompromised patients, we additionally  
215 analyzed stringent vaccination response defined as the lowest anti-SARS-CoV-2 antibody titers  
216 observed in our healthy control assuming that these would be protective. Based on this definition, only  
217 32% (Roche) and 22% (DiaSorin) of our patients demonstrated a stringent antibody response,  
218 respectively. Longitudinal studies are on their way to assess durability of anti-SARS-CoV-2 humoral  
219 responses as well as incidences of COVID-19 infections in patients with or without stringent humoral  
220 response.

221 In our study, absolute numbers of CD19<sup>+</sup>IgD<sup>+</sup>CD27<sup>-</sup> naïve B cells, CD19<sup>+</sup>IgD<sup>+</sup>CD27<sup>+</sup> pre-switched  
222 memory B cells, and CD19<sup>+</sup>IgM<sup>+</sup>CD38<sup>++</sup> plasmablasts were significantly associated with anti-  
223 SARS-CoV-2 response in univariate analysis. However, only the number of CD19<sup>+</sup>IgD<sup>+</sup>CD27<sup>-</sup> naïve B  
224 cells was an independent predictor of a stringent vaccination response in multivariable analysis,  
225 suggesting their functional importance for obtaining a humoral immune response. Indeed, the production  
226 of specific antibodies to a novel antigen relies on the presence of antigen-specific B cells within the  
227 CD19<sup>+</sup>IgD<sup>+</sup>CD27<sup>-</sup> naïve B cell population.(33) Thus, a drastically contracted pool of CD19<sup>+</sup>IgD<sup>+</sup>CD27<sup>-</sup>  
228 naïve B cells reduces the chance of harboring B cells with a B-cell receptor of high antigen avidity that  
229 can interact with T follicular helper cells successfully and subsequently undergo somatic hypermutation  
230 to develop an optimal antibody response.(34) A lack of these cells results in low antibody titers of poor  
231 quality. Therefore, the association of the magnitude of the humoral vaccination response with the  
232 abundance of CD19<sup>+</sup>IgD<sup>+</sup>CD27<sup>-</sup> naïve B cells is most likely a causal relationship.

233 To date, there is little literature on this topic, and we are the first to describe this relationship, particularly  
234 in the context of COVID-19 and immunocompromised patients. The importance of naïve B cells for

235 antibody response has already been shown for the H5N1 influenza vaccine, but to the best of our  
236 knowledge not yet for immunocompromised patient cohorts or COVID-19 in particular.(35) Recently,  
237 Redjoul and colleagues reported a significant increase in anti-SARS-CoV-2 antibodies in 42 HM  
238 patients given a third dose of BNT162b2 vaccine after allogeneic HSCT.(36) In a multivariable analysis,  
239 only a peripheral B-cell count of more than 250/ $\mu$ l at the time of the third vaccination was associated  
240 with humoral response (OR 7.1, 95% CI: 1.5-34.1, P=0.016).(36) Mrak et al. observed that the  
241 percentage of peripheral CD19<sup>+</sup> B cells positively correlated with antibody levels after BNT162b2  
242 vaccination ( $r=0.4$ , P<0.001) in patients with AIRD after rituximab therapy.[24] The median percentage  
243 of peripheral CD19<sup>+</sup> B cells was 2% (interquartile range [IQR], 0-33) in the study of Mrak et al., which  
244 is not very different from 4% (IQR, 0-13) in our patient population. Our results extend these findings  
245 and show that only CD19<sup>+</sup>IgD<sup>+</sup>CD27<sup>-</sup> naïve B cells predicted a strong vaccination response.

246 How soon humoral immune responses may be expected after B-cell depleting therapy remains a concern,  
247 and recommendations of medical societies differ. Our data confirm that the interval between the last B-  
248 cell-depleting therapy and SARS-CoV-2 vaccination plays a crucial role in achieving seroconversion  
249 for immunocompromised patients. We were able to define a minimum of 116 days, i.e. 4 months, from  
250 last B-cell-depleting therapy to vaccination as prerequisite for obtaining an anti-SARS-CoV-2  
251 seroconversion.

252 Whereas patients after allogeneic HSCT have high numbers of CD19<sup>+</sup>IgD<sup>+</sup>CD27<sup>-</sup> naïve B cells, this  
253 B-cell subpopulation was significantly lower in individuals suffering from chronic graft-versus-host  
254 disease (GVHD).(37) Long-term clinical efficacy of rituximab could be demonstrated in chronic GVHD  
255 patients recovering naïve B cells after treatment. These findings are consistent with clinical responses  
256 to rituximab reported in patients with rheumatoid arthritis, SLE, and mixed cryoglobulinemia who  
257 recovered B cells.(38-40) Thus, rise in absolute numbers of B cells as well as CD19<sup>+</sup>IgD<sup>+</sup>CD27<sup>-</sup> naïve  
258 B cells might indicate immune reconstitution after immunosuppressive therapies enabling achievement  
259 of a humoral immune response to SARS-CoV-2 vaccination. Contrarily, patients with a deficit of  
260 CD19<sup>+</sup>IgD<sup>+</sup>CD27<sup>-</sup> naïve B cells may benefit more from continuation of strict hygiene measures as  
261 recommended by scientific organizations. Whether these immunocompromised patients will

262 substantially benefit from a third vaccination, must be demonstrated since first data of HSCT patients  
263 showed only low antibody titers in half of the patients.(36)

264 Our study had several limitations. These include single-center design and limited representation of some  
265 patient cohorts that do not allow clear conclusions on seroconversion rates among less common entities  
266 or less frequently used treatment strategies. Moreover, we cannot comment on the persistence of the  
267 observed vaccination response at this point. Our study relies on the measurement of antibodies as a  
268 surrogate for immunity to SARS-CoV-2. However, our results do not significantly differ between the  
269 two internationally deployed anti-spike protein serological assays for detecting either total Ig or IgG.  
270 Both tests showed a high correlation with surrogate neutralization tests, and Roche's assay correlated  
271 well with live virus neutralization tests in vaccinated individuals.(29, 31) The strength of our study is  
272 its prospective design and the introduction of the stringent vaccination response as a potentially  
273 clinically more relevant concept than seroconversion.

274 In summary, humoral response to SARS-CoV-2 mRNA vaccine is impaired in immunocompromised  
275 patients. The abundance of circulating CD19<sup>+</sup>IgD<sup>+</sup>CD27<sup>-</sup> naïve B cells is strongly associated with an  
276 improved antibody vaccine response across different diseases and therapies. Therefore, measuring  
277 CD19<sup>+</sup>IgD<sup>+</sup>CD27<sup>-</sup> naïve B cells may allow prediction of a humoral response to COVID-19 vaccination  
278 in immunocompromised patients. Further research is needed to confirm these findings for vaccinating  
279 immunocompromised individuals against COVID-19 and other pathogens.

## 280 **Acknowledgments**

281 We thank Pia-Carina Gallaun and Julia Lodron for technical assistance. The samples/data used for this  
282 project were processed with the help of the Biobank Graz of the Medical University of Graz, Austria.

## 283 **Competing Interests**

284 None of the contributing authors have a conflict of interest, including specific financial interests,  
285 relationships, and affiliations relevant to the topic or materials covered in the manuscript.

## 286 **Author contributions**

287 IH, ES, PS, SH, HG, IS, and MHS designed the study. ES, IH, PF, NS, JF, BD, BU, AG, MM, CU, MK,  
288 CE and BK collected clinical samples and/or data. PF and BK performed antibody assays. ES and SH



289 analyzed the data and performed the statistical analysis. ES, SH, IH, PS, HG, IS, and MHS critically  
290 reviewed and discussed the results. ES, IH, PF, HS, HG, and MHS wrote the first draft. All authors  
291 reviewed the draft and approved the final version of the manuscript.

## 292 REFERENCES

293 1. Shields AM, Burns SO, Savic S, Richter AG, UK PIN COVID-19 Consortium. COVID-19 in patients  
294 with primary and secondary immunodeficiency: The United Kingdom experience. *J Allergy Clin*  
295 *Immunol* 2021; **147**: 870,875.e1.

296 2. Kuderer NM, Choueiri TK, Shah DP, Shyr Y, Rubinstein SM, Rivera DR, *et al.* Clinical impact of  
297 COVID-19 on patients with cancer (CCC19): a cohort study. *Lancet* 2020; **395**: 1907-18.

298 3. Hatzl S, Eisner F, Schilcher G, Kreuzer P, Gornicec M, Eller P, *et al.* Response to "COVID-19 in  
299 persons with haematological cancers". *Leukemia* 2020; **34**: 2265-70.

300 4. Vijenthira A, Gong IY, Fox TA, Booth S, Cook G, Fattizzo B, *et al.* Outcomes of patients with  
301 hematologic malignancies and COVID-19: a systematic review and meta-analysis of 3377 patients.  
302 *Blood* 2020; **136**: 2881-92.

303 5. Thakkar A, Gonzalez-Lugo JD, Goradia N, Gali R, Shapiro LC, Pradhan K, *et al.* Seroconversion  
304 rates following COVID-19 vaccination among patients with cancer. *Cancer Cell* 2021;.

305 6. Marra A, Generali D, Zagami P, Cervoni V, Gandini S, Venturini S, *et al.* Seroconversion in patients  
306 with cancer and oncology health care workers infected by SARS-CoV-2. *Ann Oncol* 2021; **32**: 113-9.

307 7. Roeker LE, Knorr DA, Pessin MS, Ramanathan LV, Thompson MC, Leslie LA, *et al.* Anti-SARS-  
308 CoV-2 antibody response in patients with chronic lymphocytic leukemia. *Leukemia* 2020; **34**: 3047-9.

309 8. Shah GL, DeWolf S, Lee YJ, Tamari R, Dahi PB, Lavery JA, *et al.* Favorable outcomes of COVID-  
310 19 in recipients of hematopoietic cell transplantation. *J Clin Invest* 2020; **130**: 6656-67.

- 311 9. Baker D, Roberts CAK, Pryce G, Kang AS, Marta M, Reyes S, *et al.* COVID-19 vaccine-readiness  
312 for anti-CD20-depleting therapy in autoimmune diseases. *Clin Exp Immunol* 2020; **202**: 149-61.
- 313 10. Ribas A, Sengupta R, Locke T, Zaidi SK, Campbell KM, Carethers JM, *et al.* Priority COVID-19  
314 Vaccination for Patients with Cancer while Vaccine Supply Is Limited. *Cancer Discov* 2021; **11**: 233-  
315 6.
- 316 11. van der Veldt, A A M, Oosting SF, Dingemans AC, Fehrmann RSN, GeurtsvanKessel C, Jalving M,  
317 *et al.* COVID-19 vaccination: the VOICE for patients with cancer. *Nat Med* 2021; **27**: 568-9.
- 318 12. Ameratunga R, Longhurst H, Steele R, Lehnert K, Leung E, Brooks AES, *et al.* Common Variable  
319 Immunodeficiency Disorders, T-Cell Responses to SARS-CoV-2 Vaccines, and the Risk of Chronic  
320 COVID-19. *J Allergy Clin Immunol Pract* 2021;.
- 321 13. Furer V, Rondaan C, Agmon-Levin N, van Assen S, Bijl M, Kapetanovic MC, *et al.* Point of view  
322 on the vaccination against COVID-19 in patients with autoimmune inflammatory rheumatic diseases.  
323 *RMD Open* 2021; **7**: e001594. doi: 10.1136/rmdopen-2021.
- 324 14. Hagin D, Freund T, Navon M, Halperin T, Adir D, Marom R, *et al.* Immunogenicity of Pfizer-  
325 BioNTech COVID-19 vaccine in patients with inborn errors of immunity. *J Allergy Clin Immunol* 2021;.
- 326 15. Braun-Moscovici Y, Kaplan M, Braun M, Markovits D, Giryas S, Toledano K, *et al.* Disease activity  
327 and humoral response in patients with inflammatory rheumatic diseases after two doses of the Pfizer  
328 mRNA vaccine against SARS-CoV-2. *Ann Rheum Dis* 2021;.
- 329 16. Furer V, Eviatar T, Zisman D, Peleg H, Paran D, Levartovsky D, *et al.* Immunogenicity and safety  
330 of the BNT162b2 mRNA COVID-19 vaccine in adult patients with autoimmune inflammatory  
331 rheumatic diseases and in the general population: a multicentre study. *Ann Rheum Dis* 2021;.
- 332 17. Deepak P, Kim W, Paley MA, Yang M, Carvidi AB, Demissie EG, *et al.* Effect of  
333 Immunosuppression on the Immunogenicity of mRNA Vaccines to SARS-CoV-2 : A Prospective  
334 Cohort Study. *Ann Intern Med* 2021;.

- 335 18. Jaffe D, Papadopoulos EB, Young JW, O'reilly RJ, Prockop S, Kernan NA, *et al.* Immunogenicity  
336 of recombinant hepatitis B vaccine (rHBV) in recipients of unrelated or related allogeneic hematopoietic  
337 cell (HC) transplants. *Blood* 2006; **108**: 2470-5.
- 338 19. Rubin LG, Levin MJ, Ljungman P, Davies EG, Avery R, Tomblyn M, *et al.* 2013 IDSA clinical  
339 practice guideline for vaccination of the immunocompromised host. *Clin Infect Dis* 2014; **58**: e44-100.
- 340 20. Bonilla FA, Barlan I, Chapel H, Costa-Carvalho BT, Cunningham-Rundles C, de la Morena, M T,  
341 *et al.* International Consensus Document (ICON): Common Variable Immunodeficiency Disorders. *J*  
342 *Allergy Clin Immunol Pract* 2016; **4**: 38-59.
- 343 21. Dagnev AF, Ilhan O, Lee WS, Woszczyk D, Kwak JY, Bowcock S, *et al.* Immunogenicity and  
344 safety of the adjuvanted recombinant zoster vaccine in adults with haematological malignancies: a phase  
345 3, randomised, clinical trial and post-hoc efficacy analysis. *Lancet Infect Dis* 2019; **19**: 988-1000.
- 346 22. Greenberger LM, Saltzman LA, Senefeld JW, Johnson PW, DeGennaro LJ, Nichols GL. Antibody  
347 response to SARS-CoV-2 vaccines in patients with hematologic malignancies. *Cancer Cell* 2021;.
- 348 23. Maneikis K, Šablaukas K, Ringelevičiūtė U, Vaitekėnaitė V, Čekauskienė R, Kryžauskaitė L, *et al.*  
349 Immunogenicity of the BNT162b2 COVID-19 mRNA vaccine and early clinical outcomes in patients  
350 with haematological malignancies in Lithuania: a national prospective cohort study. *Lancet Haematol*  
351 2021; **8**: e583-92.
- 352 24. Avivi I, Balaban R, Shragai T, Sheffer G, Morales M, Aharon A, *et al.* Humoral response rate and  
353 predictors of response to BNT162b2 mRNA COVID19 vaccine in patients with multiple myeloma. *Br*  
354 *J Haematol* 2021;.
- 355 25. Bird S, Panopoulou A, Shea RL, Tsui M, Saso R, Sud A, *et al.* Response to first vaccination against  
356 SARS-CoV-2 in patients with multiple myeloma. *Lancet Haematol* 2021; **8**: e389-92.

- 357 26. Gavriatopoulou M, Terpos E, Kastritis E, Briasoulis A, Gumeni S, Ntanasis-Stathopoulos I, *et al.*  
358 Low neutralizing antibody responses in WM, CLL and NHL patients after the first dose of the  
359 BNT162b2 and AZD1222 vaccine. *Clin Exp Med* 2021;; 1-5.
- 360 27. Herishanu Y, Avivi I, Aharon A, Shefer G, Levi S, Bronstein Y, *et al.* Efficacy of the BNT162b2  
361 mRNA COVID-19 vaccine in patients with chronic lymphocytic leukemia. *Blood* 2021; **137**: 3165-73.
- 362 28. Pimpinelli F, Marchesi F, Piaggio G, Giannarelli D, Papa E, Falcucci P, *et al.* Fifth-week  
363 immunogenicity and safety of anti-SARS-CoV-2 BNT162b2 vaccine in patients with multiple myeloma  
364 and myeloproliferative malignancies on active treatment: preliminary data from a single institution. *J*  
365 *Hematol Oncol* 2021; **14**: 81-021.
- 366 29. Mrak D, Tobudic S, Koblichke M, Graninger M, Radner H, Sieghart D, *et al.* SARS-CoV-2  
367 vaccination in rituximab-treated patients: B cells promote humoral immune responses in the presence  
368 of T-cell-mediated immunity. *Ann Rheum Dis* 2021;.
- 369 30. Stradner MH, Dejaco C, Brickmann K, Graninger WB, Brezinschek HP. A combination of cellular  
370 biomarkers predicts failure to respond to rituximab in rheumatoid arthritis: a 24-week observational  
371 study. *Arthritis Res Ther* 2016; **18**: 190-016.
- 372 31. Perkmann T, Perkmann-Nagele N, Koller T, Mucher P, Radakovics A, Marculescu R, *et al.* Anti-  
373 Spike Protein Assays to Determine SARS-CoV-2 Antibody Levels: a Head-to-Head Comparison of Five  
374 Quantitative Assays. *Microbiol Spectr* 2021;; e0024721.
- 375 32. Herzog Tzarfati K, Gutwein O, Apel A, Rahimi-Levene N, Sadovnik M, Harel L, *et al.* BNT162b2  
376 COVID-19 vaccine is significantly less effective in patients with hematologic malignancies. *Am J*  
377 *Hematol* 2021;.
- 378 33. Siegrist CA, Aspinall R. B-cell responses to vaccination at the extremes of age. *Nat Rev Immunol*  
379 2009; **9**: 185-94.

- 380 34. Chan TD, Brink R. Affinity-based selection and the germinal center response. *Immunol Rev* 2012;  
381 **247**: 11-23.
- 382 35. Ellebedy AH, Nachbagauer R, Jackson KJL, Dai YN, Han J, Alsoussi WB, *et al.* Adjuvanted H5N1  
383 influenza vaccine enhances both cross-reactive memory B cell and strain-specific naive B cell responses  
384 in humans. *Proc Natl Acad Sci U S A* 2020; **117**: 17957-64.
- 385 36. Redjoul R, Le Bouter A, Parinet V, Fourati S, Maury S. Antibody response after third BNT162b2  
386 dose in recipients of allogeneic HSCT. *Lancet Haematol* 2021; **8**: e681-3.
- 387 37. Sarantopoulos S, Stevenson KE, Kim HT, Cutler CS, Bhuiya NS, Schowalter M, *et al.* Altered B-  
388 cell homeostasis and excess BAFF in human chronic graft-versus-host disease. *Blood* 2009; **113**: 3865-  
389 74.
- 390 38. Leandro MJ, Cambridge G, Ehrenstein MR, Edwards JC. Reconstitution of peripheral blood B cells  
391 after depletion with rituximab in patients with rheumatoid arthritis. *Arthritis Rheum* 2006; **54**: 613-20.
- 392 39. Saadoun D, Rosenzweig M, Landau D, Piette JC, Klatzmann D, Cacoub P. Restoration of peripheral  
393 immune homeostasis after rituximab in mixed cryoglobulinemia vasculitis. *Blood* 2008; **111**: 5334-41.
- 394 40. Anolik JH, Barnard J, Cappione A, Pugh-Bernard AE, Felgar RE, Looney RJ, *et al.* Rituximab  
395 improves peripheral B cell abnormalities in human systemic lupus erythematosus. *Arthritis Rheum* 2004;  
396 **50**: 3580-90.

## 397 **FIGURE LEGENDS**

398 **Fig 1.** Immune response to SARS-CoV-2 mRNA vaccination. The scatter plot shows total  
399 immunoglobulin levels for healthy controls, immunodeficient patients and patients after anti-CD20  
400 therapy or hematopoietic stem cell transplantation (HSCT). P is <0.001 between all groups calculated  
401 with the Kruskal-Wallis test and post hoc analysis. Lines are medians with interquartile range. The Plot  
402 was drawn with GraphPad Prism Version 9.2.0.332.

403 **Fig 2.** Correlation of antibody levels determined by Roche anti-SARS-CoV-2 S assay. (A) DiaSorin  
404 SARS-CoV-2 TrimericS IgG. (B) Absolute number of B cells (CD19<sup>+</sup> cells). (C) Absolute number of  
405 naïve B cells. Scatter plots indicate a linear regression line including a 95% confidence interval. In case  
406 of A and B, regression line corresponds to transformed data using  $x=\log((x+1))$  and  $y=\log((y+1))$ ,  
407 respectively.

408 **Fig 3.** Exploratory analyses estimating the number of naïve B cells and the interval to the last B-cell  
409 depleting therapy required for a vaccination response. (A) The receiver operating characteristic (ROC)  
410 analysis curve for naïve B cells differentiating stringent antibody response vs no or any vaccination  
411 response in the whole study population (n=199) shows excellent discrimination. (B) A non-linear risk  
412 model based on the observed risk of seroconversion was created to estimate the minimum number of  
413 naïve B cells required for a stringent vaccination response. Independently, the best discriminatory cut-  
414 off (dashed line) was determined with the Youden's index from the ROC curve. Both models predict  
415 that  $\geq 60$  naïve B cell per  $\mu\text{l}$  are required to generate a stringent vaccine response. (C) The ROC analysis  
416 curve for the interval since the last B-cell depleting therapy up to 365 days (n=53) differentiating any  
417 seroconversion vs no vaccination response. The optimal cut-off is an interval of 116 days or more.

Roche anti-SARS-CoV-2 S total Ig [U/mL]

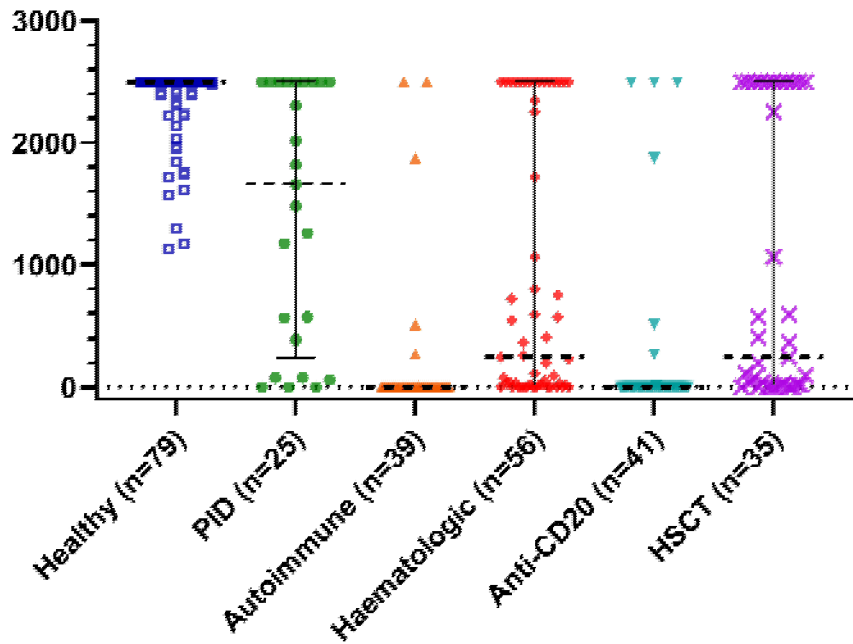

Figure 2

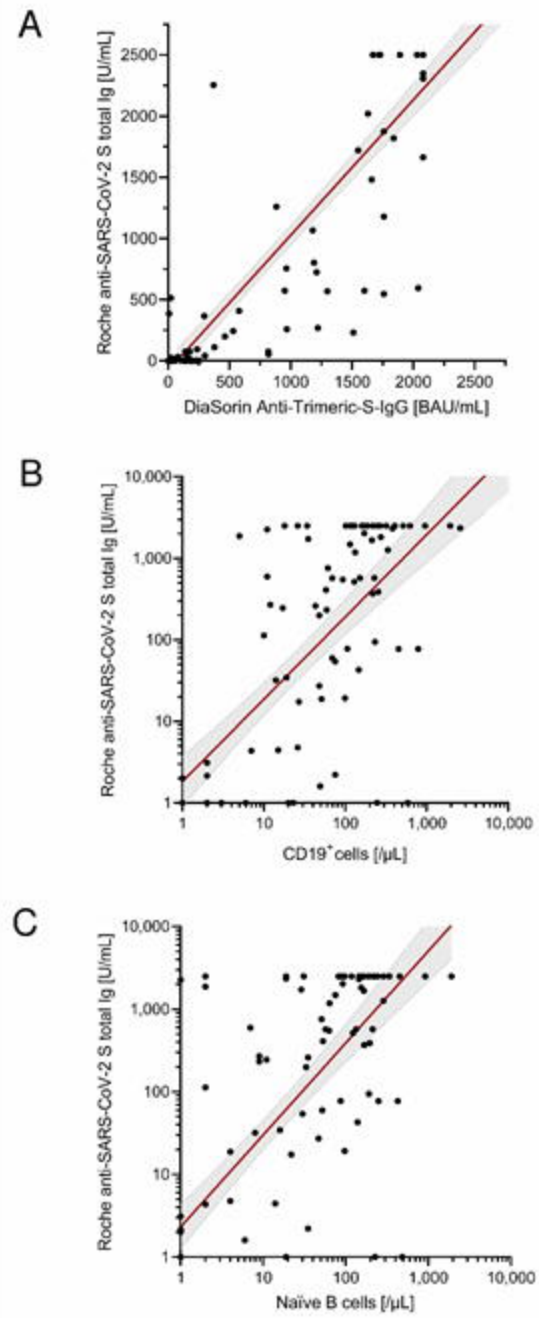



Figure 3

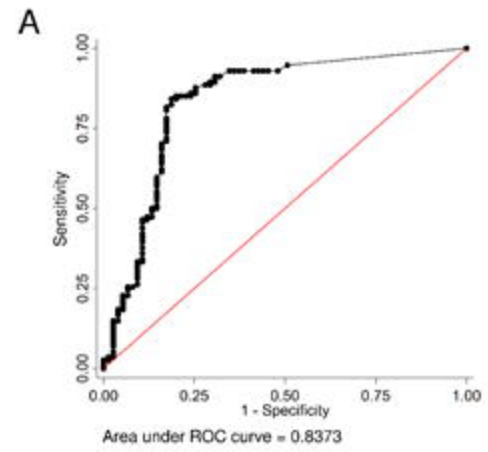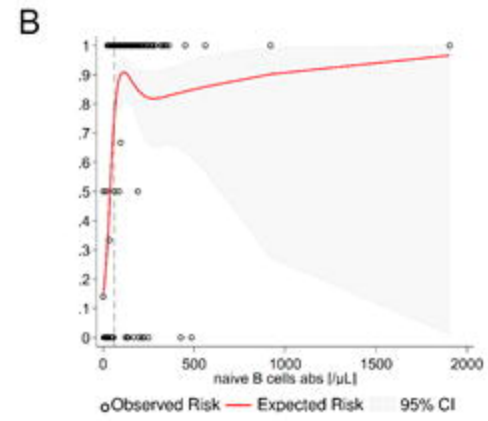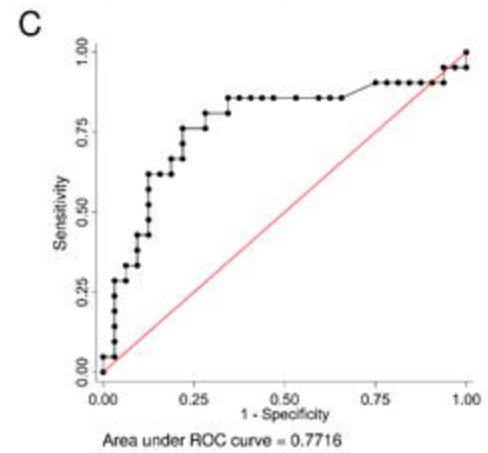

Source: https://www.medrxiv.org/content/medrxiv/early/2021/09/29/2021.08.11.21261898.full.pdf
